# Supplementary figures and images for: Upregulation of CD36, a Fatty Acid Translocase, Promotes Colorectal Cancer Metastasis by Increasing MMP28 and Decreasing E-Cadherin Expression
Source: MDPI journal article supplement (doi:10.3390/cancers14010252), 2022-01-05

Table: Snapshot of enrichment results

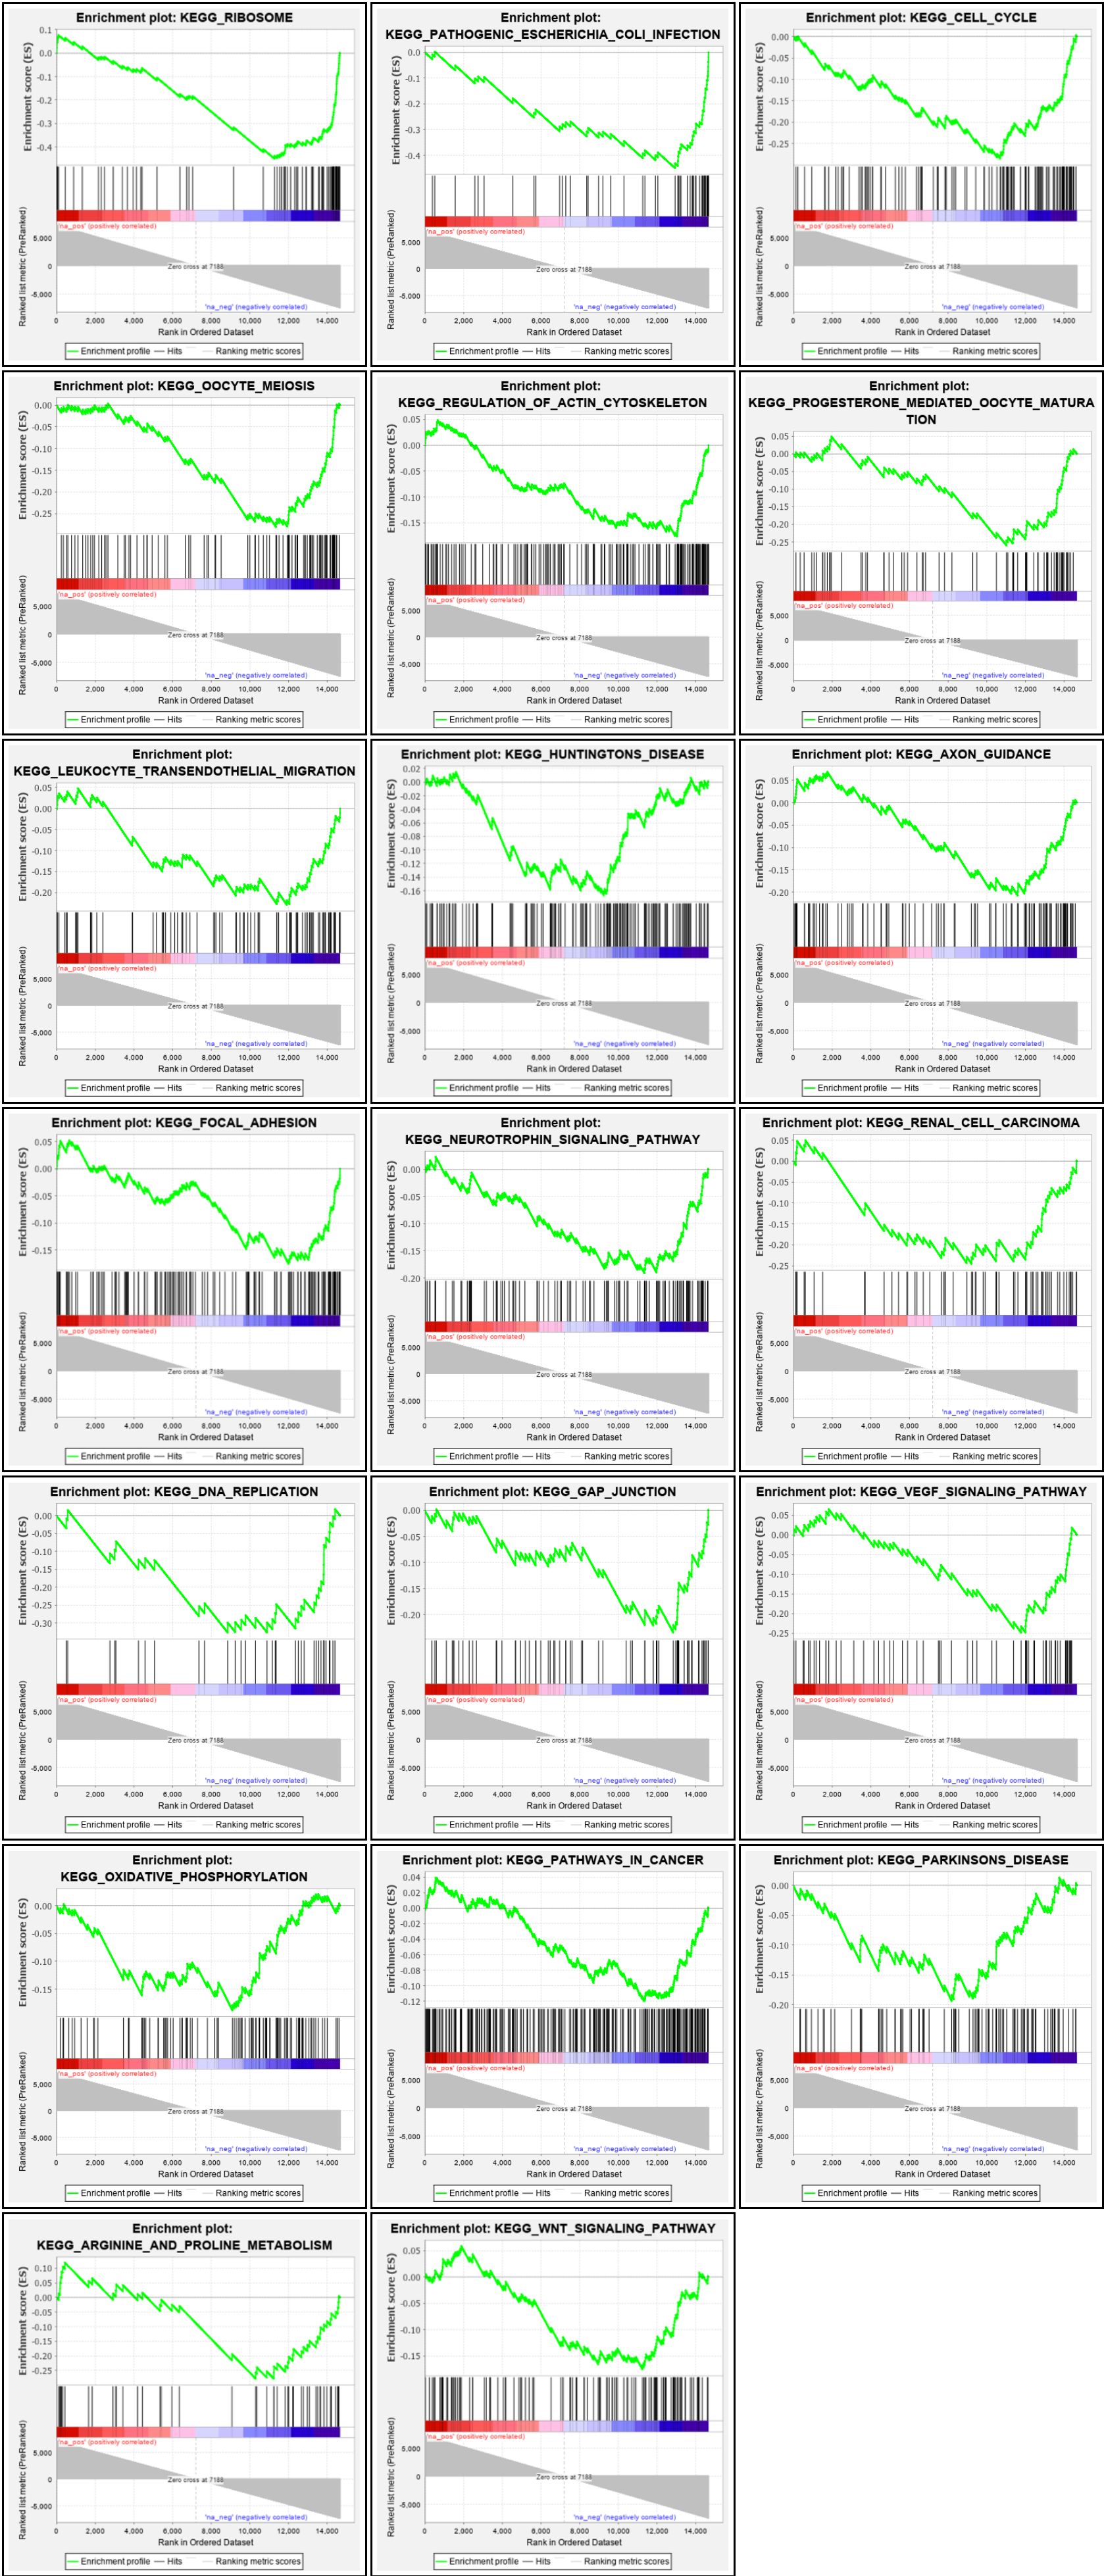

Supplement: s1 [file s1]

Table: Snapshot of enrichment results

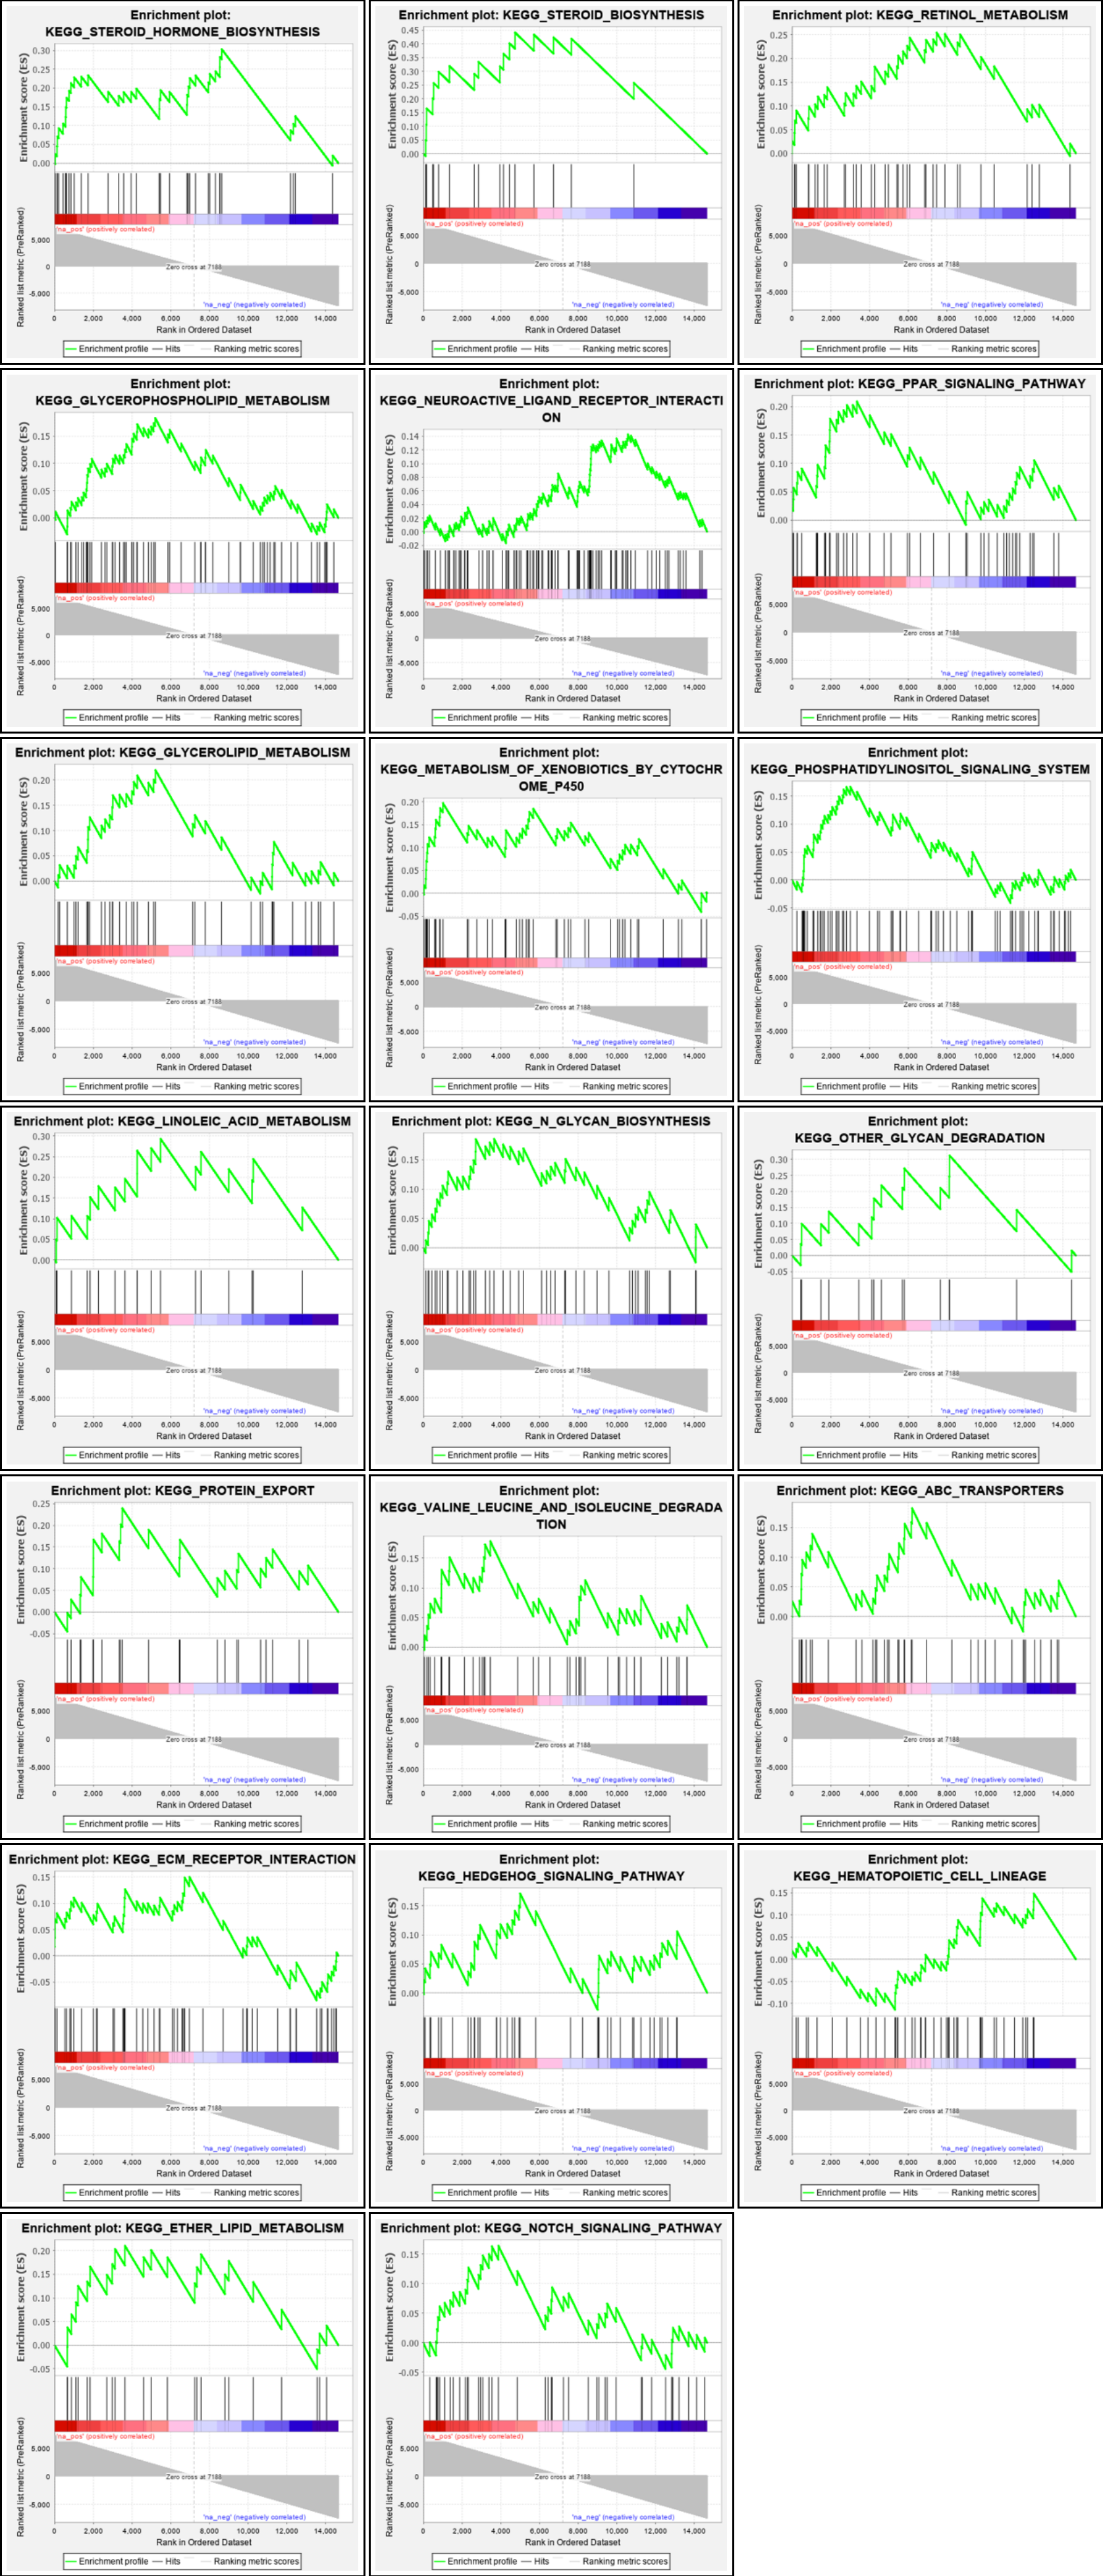

Supplement: s1 [file s1]
